# Supplementary material for: NuRD-mediated deacetylation of H3K27 facilitates recruitment of Polycomb Repressive Complex 2 to direct gene repression
Source: PubMed Central journal article supplement — EMBO J. 2011 Dec 2;31(3):593–605. doi: 10.1038/emboj.2011.431 (PMC3273378; doi:10.1038/emboj.2011.431), 2011-12-02

## **Reynolds et al. Supplementary Information**

### **Supplementary Figures**

#### **Supplementary Figure 1. ChIP for NuRD component proteins.**

ChIP-qPCR for putative NuRD targets for proteins other than Mi2 $\beta$  which are unique to NuRD (Mbd3, MTA2) or which are not uniquely found in NuRD (HDAC1). qPCR is shown relative to level in IgG control either at regions close to TSS for individual genes, or across a single target locus, *Htra1*. Distance from TSS is shown in base pairs.

**Supplementary Figure 2. Distribution of histone modifications.** (A) At the whole gene level. Distance is shown in base pairs for upstream, 3kb Metagene, and downstream regions. (B) At transcription termination sites. Profiles, normalized to input, are of up-regulated, bivalent genes for  $\alpha$ H3K27me3 and  $\alpha$ H3K27ac ChIP samples (solid line) relative to that for all RefSeq genes in each sample (dotted line).

**Supplementary Figure 3. Distribution of histone modifications for genes bound by Mi2 $\beta$ .** Profiles, normalized to input for genes bound by Mi2 $\beta$  at transcription termination site (TSS) for  $\alpha$ H3K27me3 and  $\alpha$ H3K27ac ChIP samples. Profiles shown are for genes bound by Mi2 $\beta$  (solid line) relative to that for all Ref-Seq genes in each sample (dotted line).

**Supplementary Figure 4. NuRD and PRC2 complexes do not co-immunoprecipitate in ES cells.** (A) Immunoprecipitation of Mi2 $\beta$  or IgG control probed for presence of Jarid2, MTA2 and Mi2 $\beta$ . (B) Avi-tagged Mbd3 pulled down using streptavidin beads,

probed for presence of PRC2 component Ezh2 or known NuRD interactor Sall4. Pull-downs were performed in the presence or absence of nucleases as indicated. (C) Immunoprecipitation of either MTA2 or Jarid2, probed for the presence of Suz12 or MTA2. All precipitations were carried out using nuclear extracts from wild type ES cells.

**Supplementary Figure 5. Effect of TSA treatment on transcription over time.**

Quantitative RT-PCR from cells grown in TSA for varying times, or from *Mbd3*<sup>-/-</sup> cells shown relative to wild type expression levels in the absence of TSA. Error bars indicate sem.

**Supplementary Figure 6. Distribution of histone modifications for genes at which PRC2 occupancy is dependent on NuRD.** Profiles, normalized to input at transcription start site (TSS) for  $\alpha$ H3K27me3 and  $\alpha$ H3K27ac ChIP samples at those genes bound by Suz12 in wt cells but not in *Mbd3*<sup>-/-</sup> and which are also bound by Mi2 $\beta$  (solid line) relative to that for all Ref-Seq genes in each sample (dotted line).

**Supplementary Table 1. Results of microarray analysis comparing *Mbd3*<sup>-/-</sup> to wild type cell lines.**

**Supplementary Table 2. Summary of genomic regions bound by Mi2 $\beta$  in wild type ES cells.**

**Supplementary Table 3. Summary of ChIP-Seq data for H3K27 modifications in wild type and *Mbd3*<sup>-/-</sup> ES cells.**

**Supplementary Table 4. Comparison of gene expression patterns in *Mbd3*-null and PRC-null ES cells.**

**Supplementary Table S5. Summary of genomic regions bound by Suz12 in wild type and *Mbd3*<sup>-/-</sup> ES cells.**

**Supplementary Table 6a. Primers For Expression Analysis**

| Gene           | Forward                  | Reverse                   |
|----------------|--------------------------|---------------------------|
| <i>β Actin</i> | GTGGGCCGCTCTAGACACCA     | CGGTTGGCCTTAGGGTTCAGGGGGG |
| <i>Htra1</i>   | ACTTCGGA ACTCCGATATGG    | CGTGGGACTCTGTCAAGAAC      |
| <i>Klf2</i>    | CTAAAGGCGCATCTGCGTA      | TAGTGGCGGGTAAGCTCGT       |
| <i>Klf4</i>    | CGGGAAGGGAGAAGACACT      | GAGTTCCTCACGCCAACG        |
| <i>Klf5</i>    | CCGGAGACGATCTGAAACAC     | CAGATACTTCTCCATTTACATCTTG |
| <i>Lefty2</i>  | GCAGGTCCAGGTACATCTCC     | ACACGCTGGACCTCAAGGAC      |
| <i>Mcm6</i>    | GAGAAACACGCTGGTTGTGA     | AAGGTCTTCAAGGCTCGACA      |
| <i>Pp1A</i>    | CACGGGGGCCTGTCTCCAGA     | GTCAGGCACGTCTGTGGGCC      |
| <i>Ppp2r2c</i> | TTCCCGCTGGAAGATAACC      | CGCGGAAAATTAACCACAGC      |
| <i>Smad7</i>   | TCTCCCCCTCCTCCTTACTC     | TCCAGAAGAAGTTGGGAATC      |
| <i>Sohlh2</i>  | TTCTGATTTGTCCTGGCAGC     | TATTCCATGACTGCTGCAGG      |
| <i>Sox9</i>    | CCACGGAACAGACTCACATCTCTC | CTGCTCAGTTCACCGATGTCCACG  |
| <i>T</i>       | TGCTTCCCTGAGACCCAGTT     | GATCACTTCTTTCCTTTGCATCAAG |
| <i>Tbx3</i>    | GAACCTACCTGTTCCCGGAAA    | CCATTGCCAGTGTCTCGAAAAC    |

**Supplementary Table 6b. Primers For Chromatin IP Analysis**

| Gene | Forward | Reverse | Distance of mid-point |
|------|---------|---------|-----------------------|
|------|---------|---------|-----------------------|

|                                      |                              |                              | from TSS<br>(bp) |
|--------------------------------------|------------------------------|------------------------------|------------------|
| <i>β Actin</i>                       | GCCTAGTAACCGAGACAT<br>TGA    | AGAAAGCGAGATTGAGG<br>AAG     | -3250            |
| <i>Cdx2</i>                          | AAGCCTGCCTTTCTGGACT<br>T     | TACGAGCTTCCTCCTTCCA<br>A     | -280             |
| <i>Htral1</i>                        | AGCAGCACCCCTTGATCCTA<br>A    | GGGATGCCAGACAGAAA<br>GAA     | -2040            |
| <i>Htral1</i>                        | TGGCGAGGTGCATGGGGA<br>ACT    | AGTCCCAGCGCTCGGGCA<br>AA     | -696             |
| <i>Htral1</i>                        | TCCAGCGCTCGGGCAA<br>TC       | TCTGCCTCCGGGGTGACA<br>GT     | -646             |
| <i>Htral1</i>                        | ACTTGAACTAGGTCTGG<br>GC      | GGCACTTAACAGAGGGAA<br>AC     | -236             |
| <i>Htral1</i>                        | GGTTTCCCTCTGTTAAGTG<br>C     | GGCTCAGTTTCTCATTCTA<br>GG    | -109             |
| <i>Htral1</i>                        | GTCACCGCCGCTAGGCCA<br>ATG    | GGGTCTTGGGGACAGCGG<br>GT     | 65               |
| <i>Htral1</i>                        | GCGGCTCCTTCCTTGGCGT<br>T     | TGGGATCGCAGTGCTCGG<br>GA     | 250              |
| <i>Htral1</i>                        | CTCGCCAACTCAGCCCGA<br>CC     | TGCTTCTCTGCACCTCCGC<br>A     | 708              |
| <i>Htral1</i>                        | GGGTGTTCTAGGCATCCA<br>GT     | GATGCTTGGCGCAGAAAT<br>AG     | 795              |
| <i>Htral1</i>                        | GAGGGGCCCACTGGGGAT<br>GAA    | TGTCGCCACCACCACGTC<br>CA     | 1356             |
| <i>Htral1</i>                        | GGCCCCAGTGGCCCCCTAA<br>GT    | AGTCAGGGCGAAGCCAGG<br>CT     | 2733             |
| <i>Htral1</i>                        | TCTGCTAACAGTGCCAATG<br>C     | ACAGGTTACGATCCACA<br>CA      | 3643             |
| <i>Klf2</i>                          | GGGGCTTGAGGCTGGGGA<br>GA     | GGCGACGGCGTCAACAAA<br>CC     | -265             |
| <i>Klf4</i>                          | CTCACCCCCACCCTACG            | ATTATCCGCGTGACTCAT<br>CC     | -570             |
| <i>Klf5</i>                          | GTCGGAGGCGGGACCTCG<br>TG     | GTCGGAGGCGGGACCTCG<br>TG     | -66              |
| <i>Lefty2</i>                        | GAACACACATCAGGTGGT<br>GG     | CAGGGCAGACTTCTTTGA<br>GG     | -4500            |
| <i>Mcm6</i><br>(Peng et al,<br>2009) | CTTATCGGAGGCACCTATA<br>GTGAT | CTAACTCTCCTAGCCTCCT<br>GACAC | 993              |
| <i>Ppp2r2c</i>                       | CCGCGATATCCTCGCGCTC<br>C     | AGCGGTCACCTCCGGAAC<br>CA     | -186             |
| <i>Smad7</i>                         | GGTGGCAGTAACTGGGAG<br>G      | CGTCTAGACACCCTGTCTG<br>CT    | -397             |

|                  |                              |                              |       |
|------------------|------------------------------|------------------------------|-------|
| <i>Sohlh2</i>    | CCATTGGTTCTCAAGTCAG<br>C     | GGCGGTTTCTTTAATTCAG<br>GAT   | -328  |
| <i>Sox9</i><br>1 | TATTAGAGACCCTGAGCT<br>GGAAGT | CTGGACTGAAACTGGTAA<br>AGTTGT | 24    |
| <i>T</i>         | GGGAGTGGGGACTGCCCG<br>AA     | GTGCCAGGGAATGACGGG<br>CC     | -3265 |
| <i>T</i>         | GCGGAGGCTCAGGCACGA<br>AG     | CTGGGCACTGCTGGCTGC<br>TT     | -2117 |
| <i>T</i>         | GGTCGGGGTTGGGCGCAA<br>ATG    | AGCCAACCTCTGGGGTGG<br>GATG   | -1399 |
| <i>T</i>         | CAGTCCATGGGGCGAGGG<br>GA     | GGCGTCTCCCGGGTCTCC<br>TT     | -629  |
| <i>T</i>         | CTGCGCCCGACGCTTTCCT<br>TA    | CTCCCGCAAGGCGCGACA<br>AG     | -234  |
| <i>T</i>         | TCTCGGTGCTCCTTTGGCG<br>AAT   | CGCTGAGCAGGTGGTCCA<br>CTC    | 64    |
| <i>T</i>         | CCTACCTGCCGTTCTTGGT<br>CACA  | GTGGGCCTGGAGGAGAGC<br>GA     | 278   |
| <i>T</i>         | CACCGAACGCGAACTGCG<br>AG     | ACAAAGTCGGCCGGTGG<br>GAA     | 312   |
| <i>T</i>         | CTTTGTTTCTTCCCGCTGA<br>G     | GCAAACCTGGTCATTCCA<br>GT     | 474   |
| <i>T</i>         | CTGGCTCTGGCCATAGGTG<br>AGC   | GTGCAGAGTAGCCAGTGT<br>CCCCT  | 1311  |
| <i>T</i>         | GCCCGCAACGCATGATCA<br>C      | GGGACTCCCTTCCGAAAC<br>CTCAC  | 1796  |
| <i>T</i>         | ACGGGAAAGTCCTGGCAA<br>AGGCT  | GCCCCAGGGGACTGATGA<br>CACA   | 2113  |
| <i>Tbx3</i>      | AGGCACCCAGAGATAAGT<br>GTGATG | GAGCTGCCGCTCTGGGCT<br>TG     | -817  |

## Supplementary Table 7

### Antibodies

| Antibody             | Source          | Reference |
|----------------------|-----------------|-----------|
| $\alpha$ Mi2 $\beta$ | Abcam           | ab70469   |
| $\alpha$ MTA2        | Santa Cruz      | sc-9447   |
| $\alpha$ Mbd3        | Santa Cruz      | sc-9402   |
| $\alpha$ Suz12       | Cell Signalling | 3737s     |
| $\alpha$ Ezh2        | Active Motif    | 39104     |
| $\alpha$ Eed         | Millipore       | 09-774    |

|                       |                                           |            |
|-----------------------|-------------------------------------------|------------|
| $\alpha$ Jarid2       | Novus Biologicals                         | NB100-2214 |
| $\alpha$ H3K4me3      | Millipore                                 | 04-745     |
| $\alpha$ H3K9ac       | Millipore                                 | 06-942     |
| $\alpha$ H3K9me3      | Abcam                                     | ab8898     |
| $\alpha$ H3K14ac      | L. O'Neill, University of Birmingham, UK. |            |
| $\alpha$ H3K36ac      | Millipore                                 | 07-540     |
| $\alpha$ H4K16ac      | L. O'Neill, University of Birmingham, UK. |            |
| $\alpha$ H4K5ac       | L. O'Neill, University of Birmingham, UK. |            |
| $\alpha$ H3K27ac      | Abcam                                     | ab4729-25  |
| $\alpha$ H3K27me3     | Millipore                                 | 07-449     |
| $\alpha$ H3           | Abcam                                     | ab1791     |
| $\alpha$ tubulin      | Santa Cruz                                | sc-5286    |
| $\alpha$ ER $\alpha$  | Santa Cruz                                | Sc-543     |
| Rabbit IgG from serum | Sigma                                     | I8140      |
| Mouse IgG from serum  | Sigma                                     | I8765      |

### Supplementary References

Leeb M, Pasini D, Novatchkova M, Jaritz M, Helin K, Wutz A (2010) Polycomb complexes act redundantly to repress genomic repeats and genes. *Genes & development* **24**: 265-276

Peng JC, Valouev A, Swigut T, Zhang J, Zhao Y, Sidow A, Wysocka J (2009) Jarid2/Jumonji coordinates control of PRC2 enzymatic activity and target gene occupancy in pluripotent cells. *Cell* **139**: 1290-1302

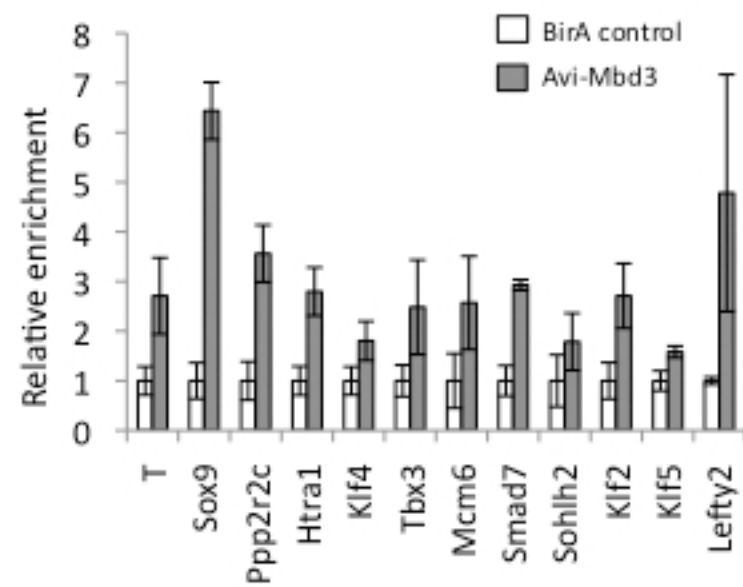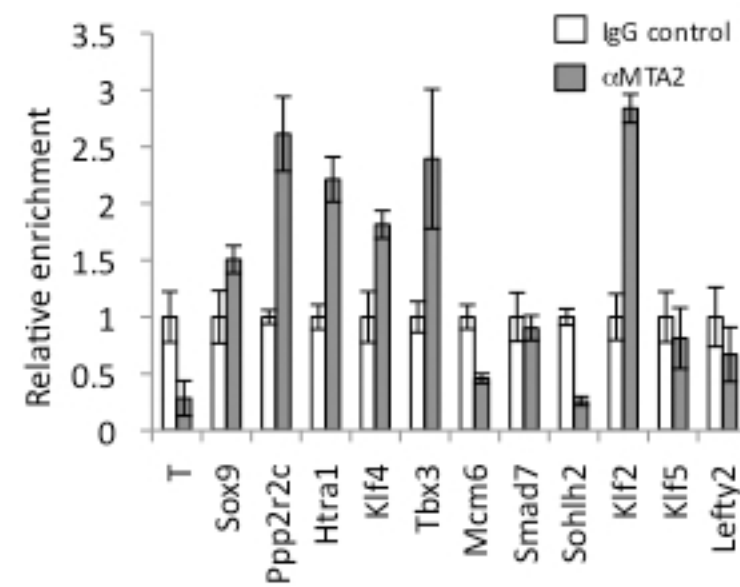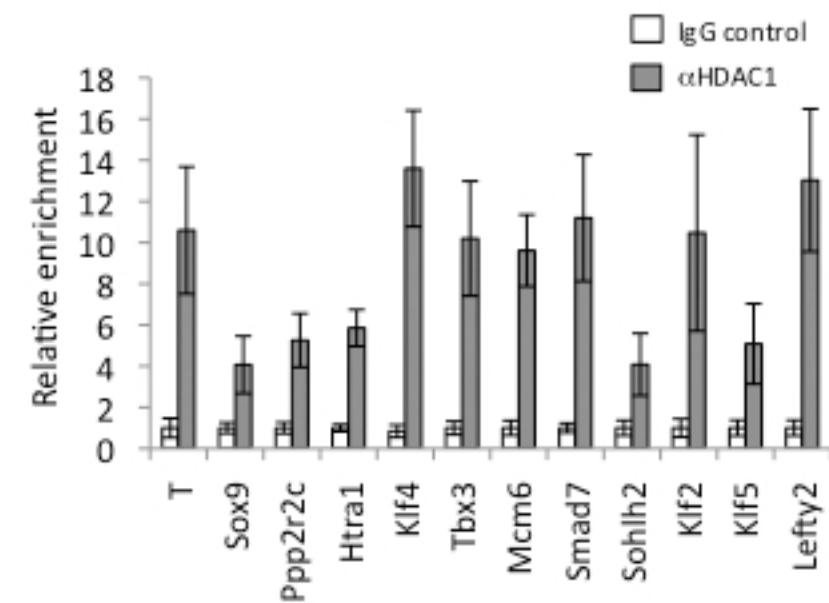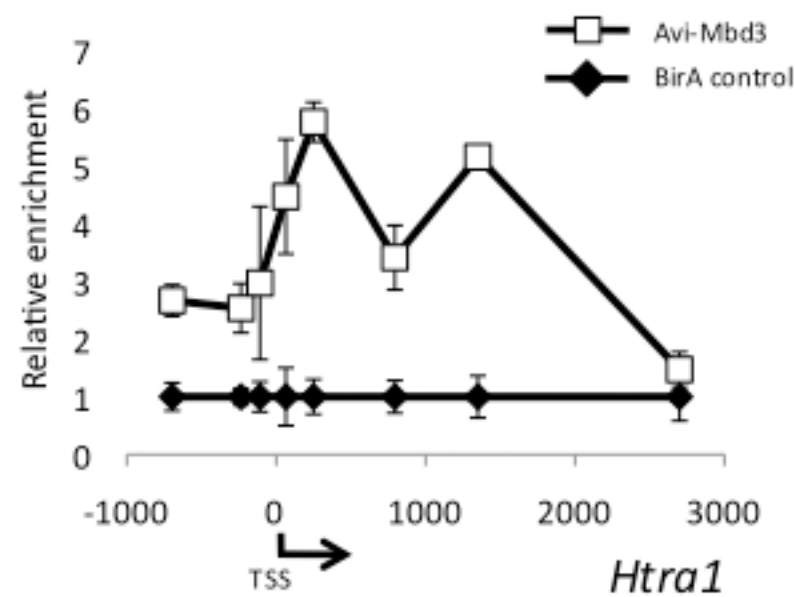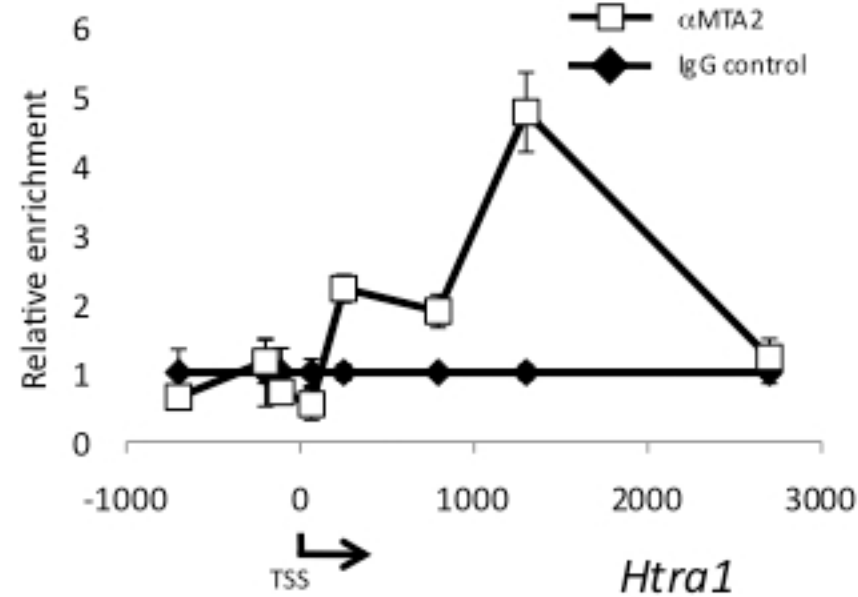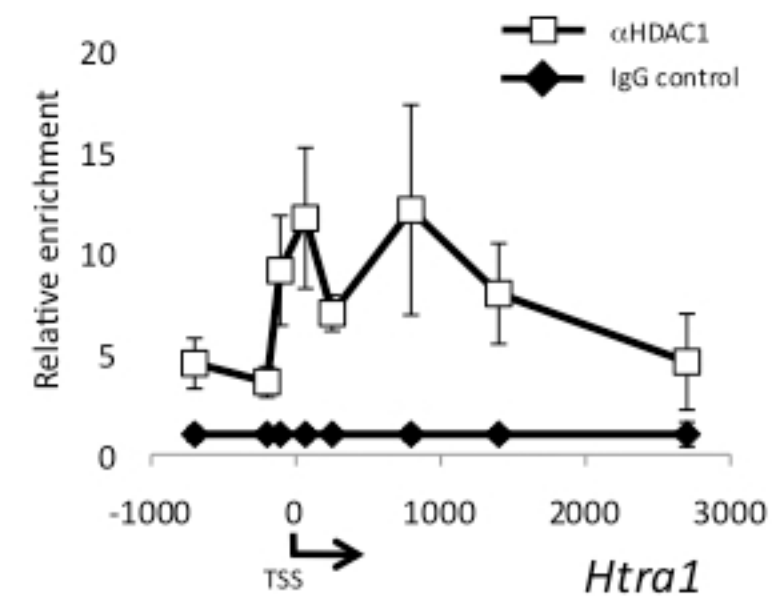

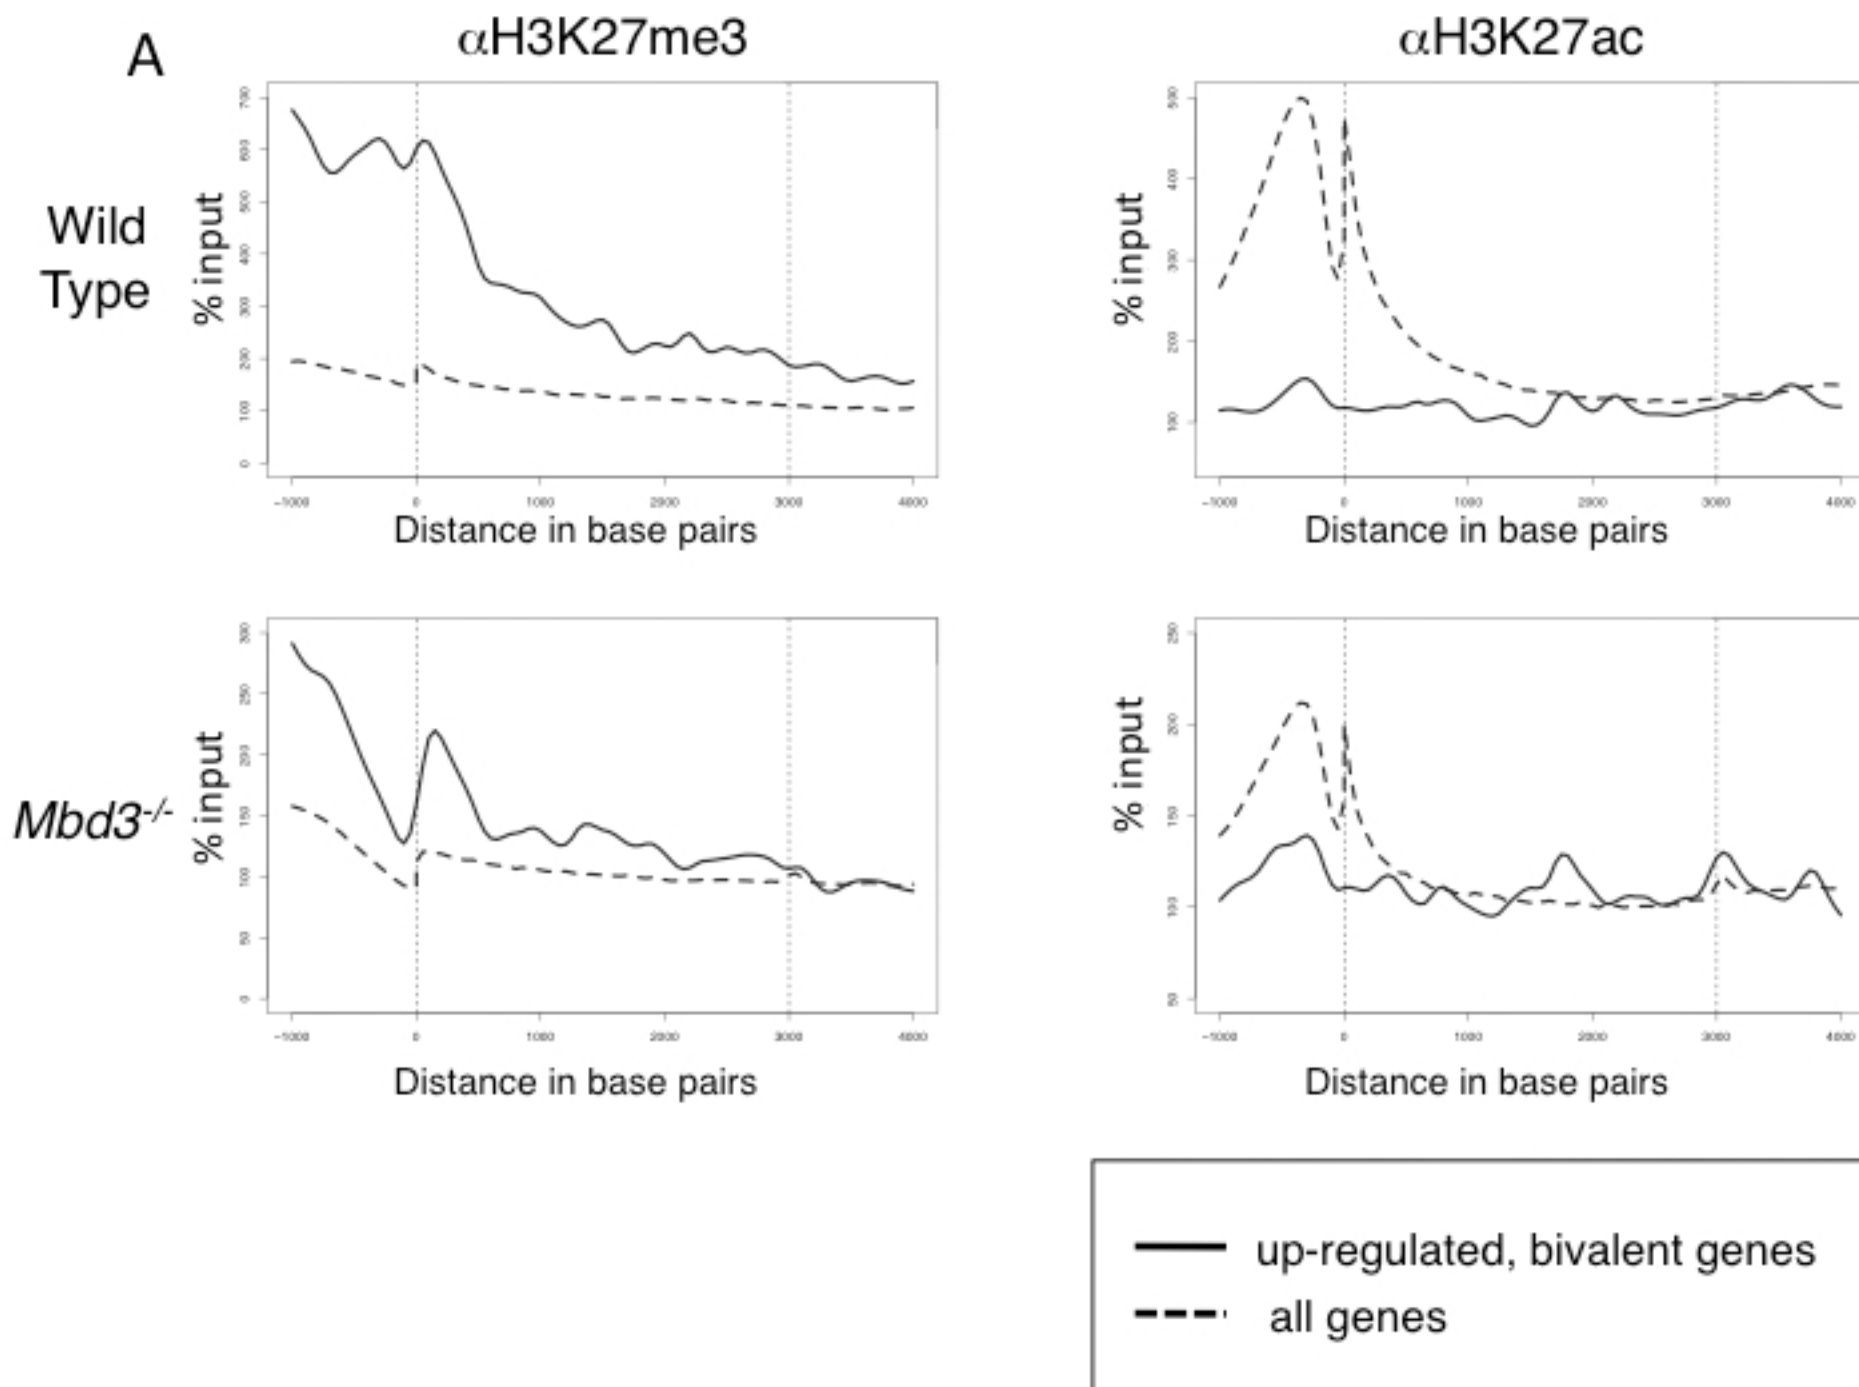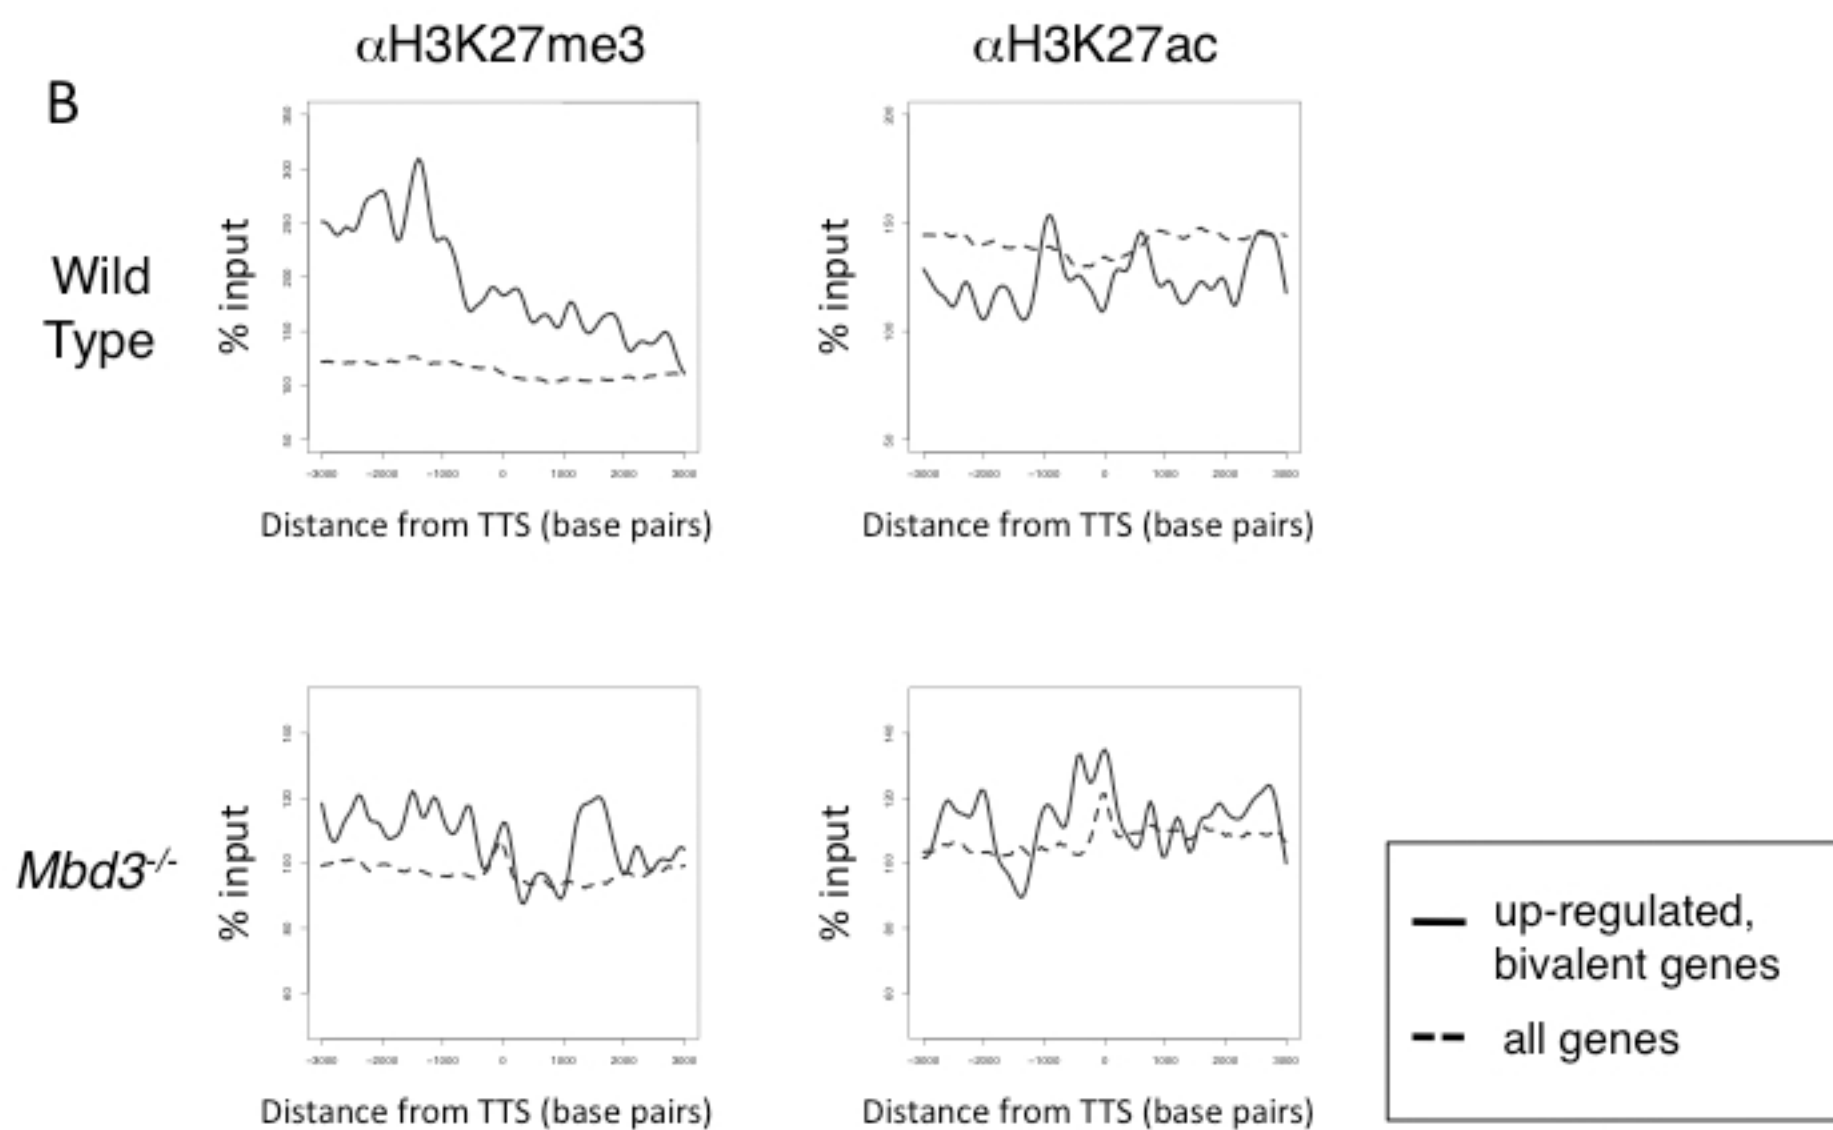



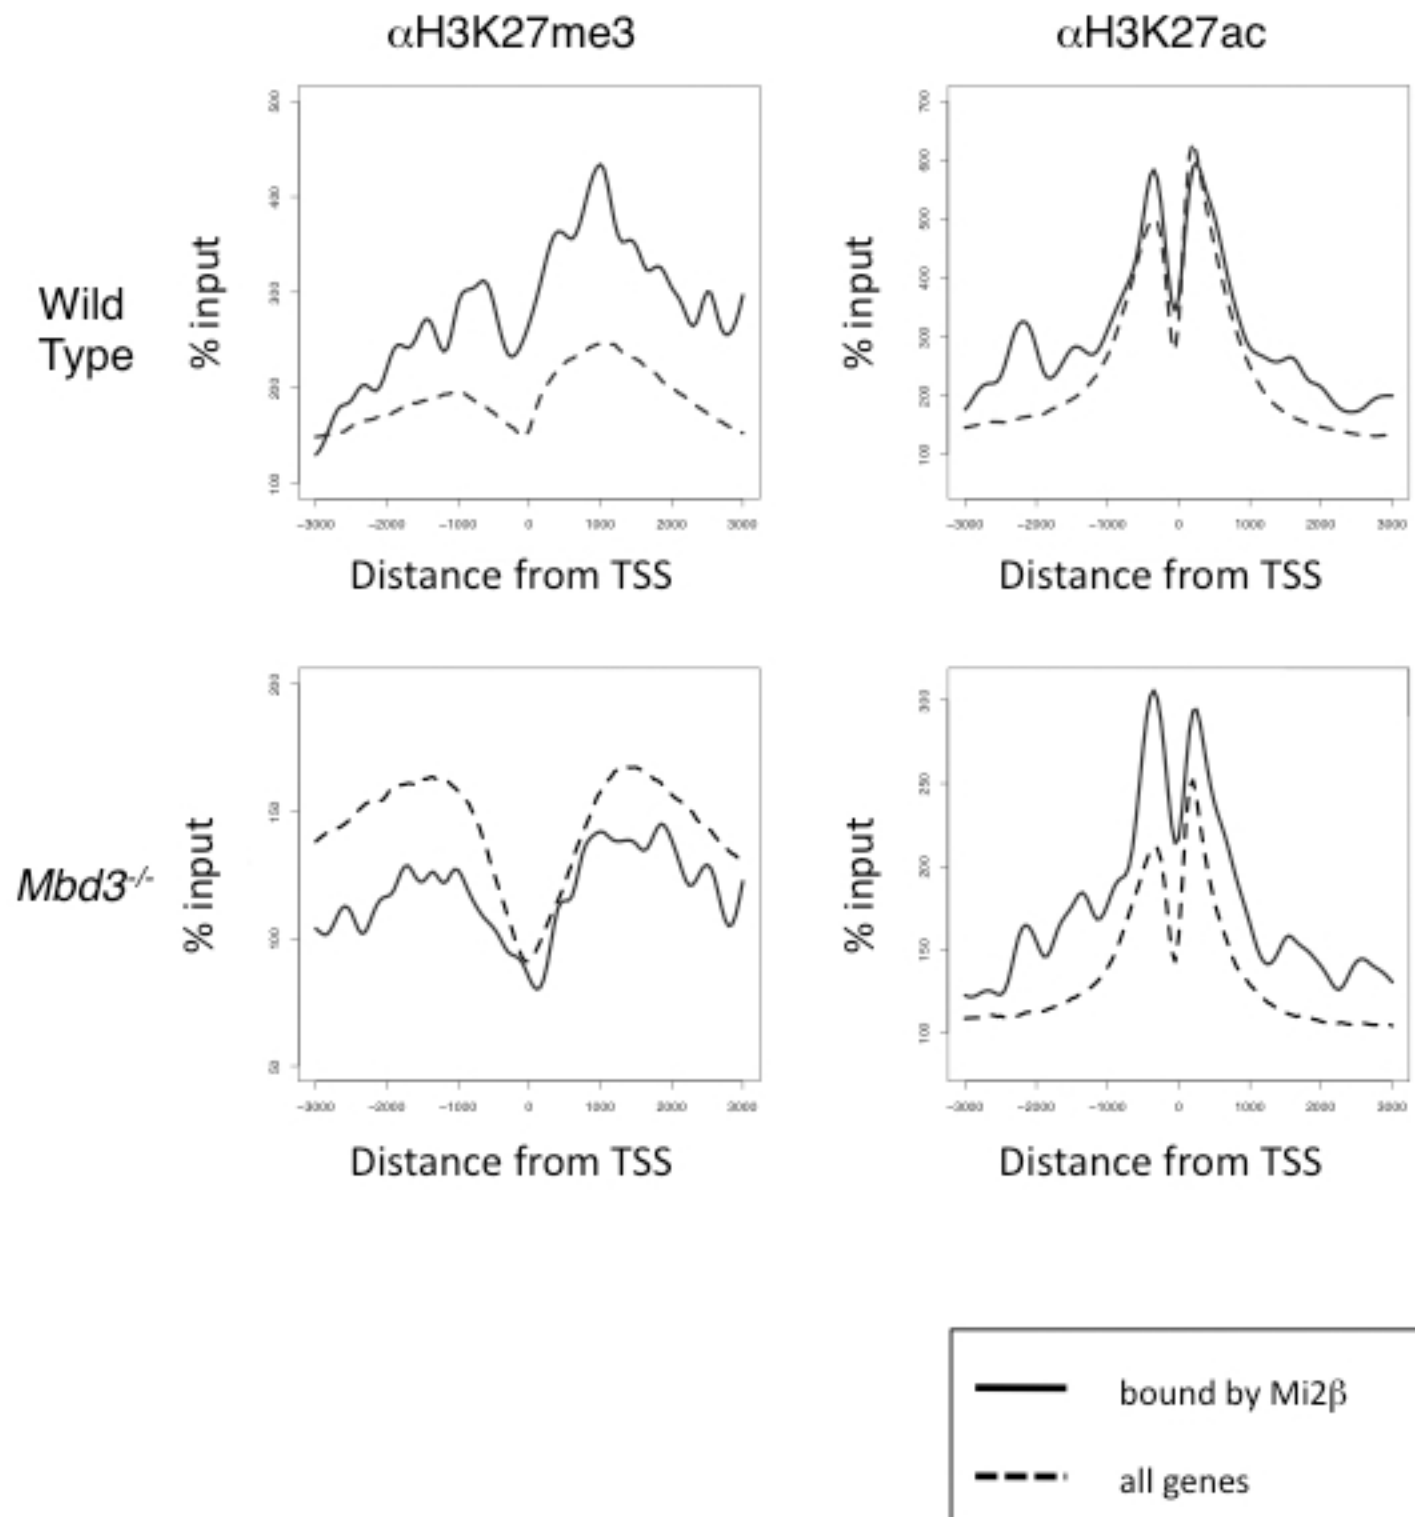

**A**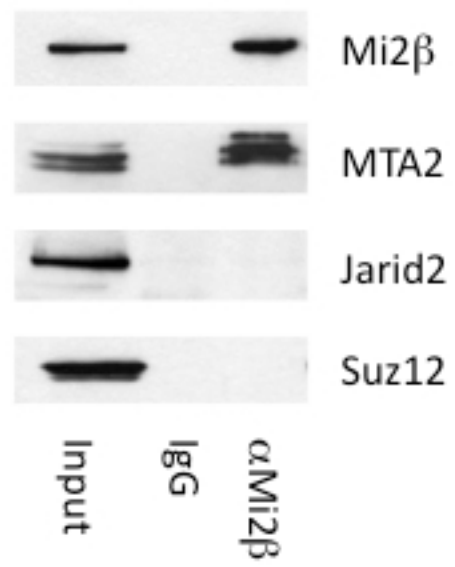**B**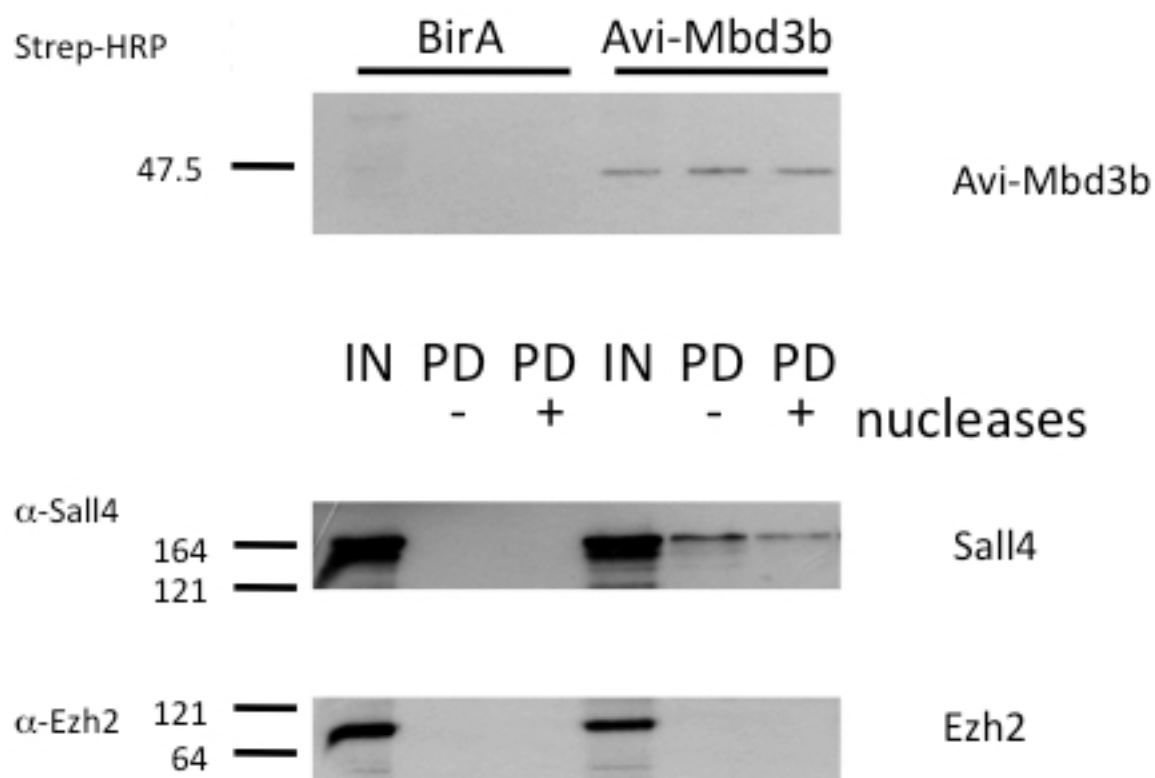**C**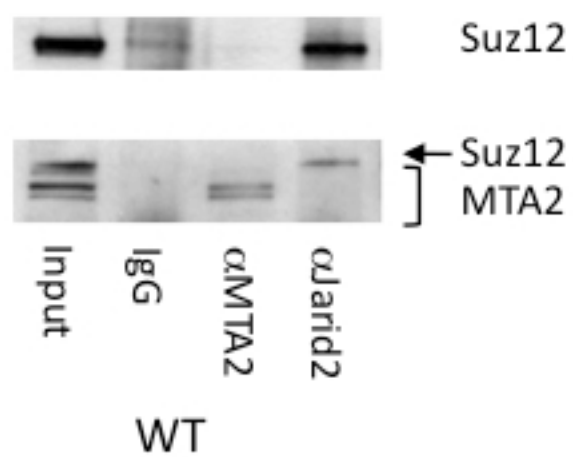

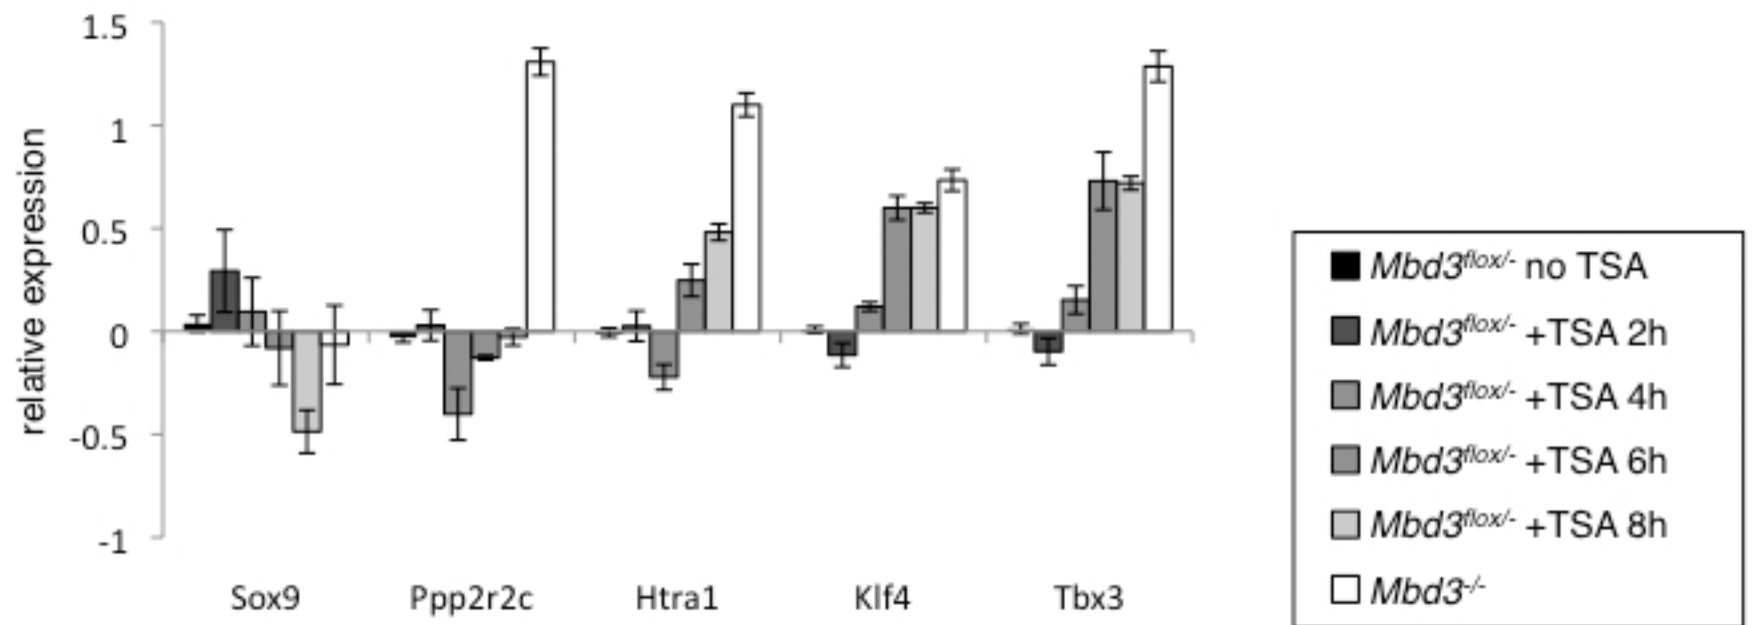

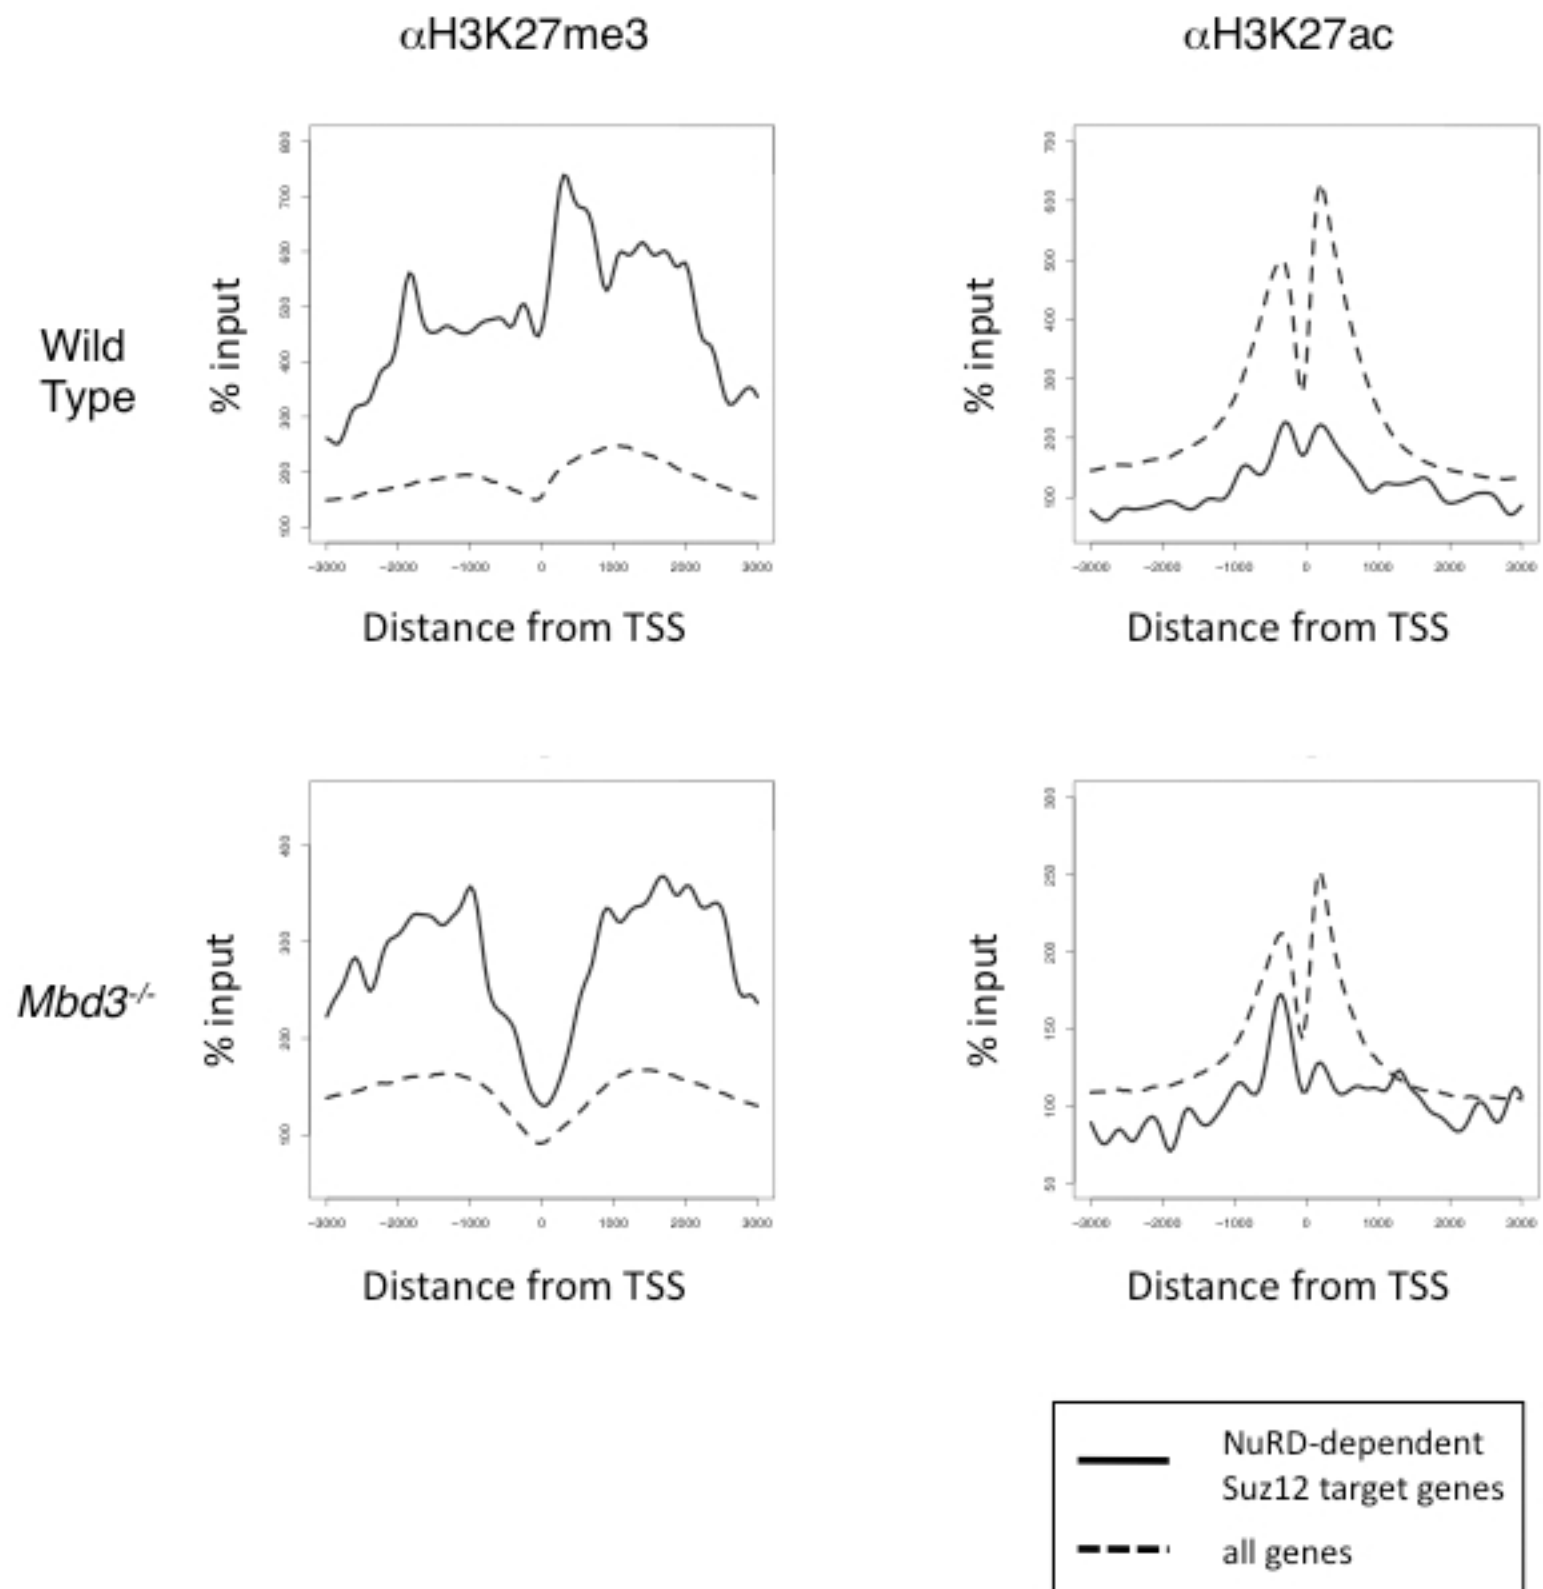

Supplement: emboj2011431s1.pdf [file emboj2011431s1.pdf]
